# Supplementary material
Source: publisher figshare collection journal article supplement (https://acs.figshare.com/ndownloader/files/31067786)
Supplement: Supplementary file 1 [file 31067786]

Supporting information for

**Revealing the surface chemistry for CO<sub>2</sub> hydrogenation on Cu/CeO<sub>2-x</sub> using near-ambient pressure X-ray photoelectron spectroscopy**

Mo Li<sup>1,2</sup>, Thi Ha My Pham<sup>1,2</sup>, Emad Oveisi<sup>3</sup>, Youngdon Ko<sup>1,2</sup>, Wen Luo<sup>1,2,4\*</sup>, Andreas Züttel<sup>1,2</sup>

1. Laboratory of Materials for Renewable Energy (LMER), Institute of Chemical Sciences and Engineering (ISIC), Basic Science Faculty (SB), École Polytechnique Fédérale de Lausanne (EPFL) Valais/Wallis, Energypolis, Rue de l'Industrie 17, CH-1951 Sion, Switzerland

2. Empa Materials Science and Technology, CH-8600 Dübendorf, Switzerland

3. Interdisciplinary Centre for Electron Microscopy (CIME), École Polytechnique Fédérale de Lausanne (EPFL), CH-1015 Lausanne, Switzerland

4. School of Environmental and Chemical Engineering, Shanghai University, 99 Shangda Road, Shanghai 200444, China

\*Corresponding author: [wenluo@shu.edu.cn](mailto:wenluo@shu.edu.cn), [wen.luo@epfl.ch](mailto:wen.luo@epfl.ch)

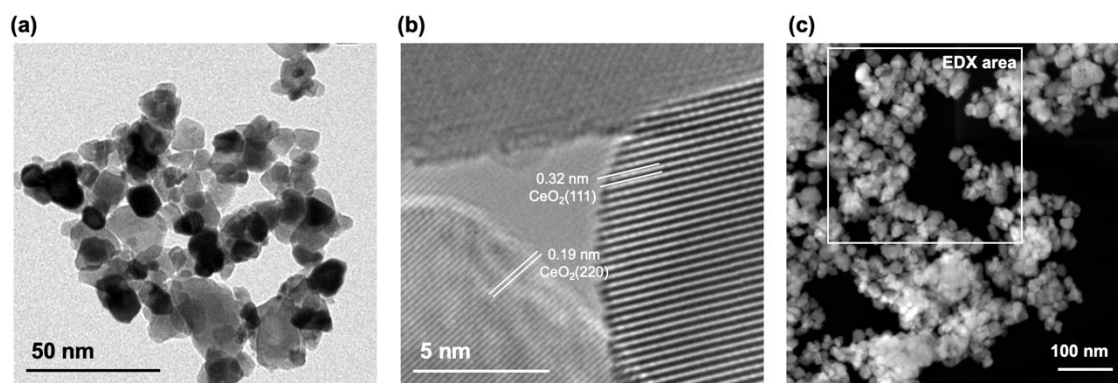

Figure S1 Representative (a) TEM, (b) HRTEM, (c) HAADF-STEM images of the Cu/CeO<sub>2-x</sub> catalyst. The area for EDX element map is shown in (c).

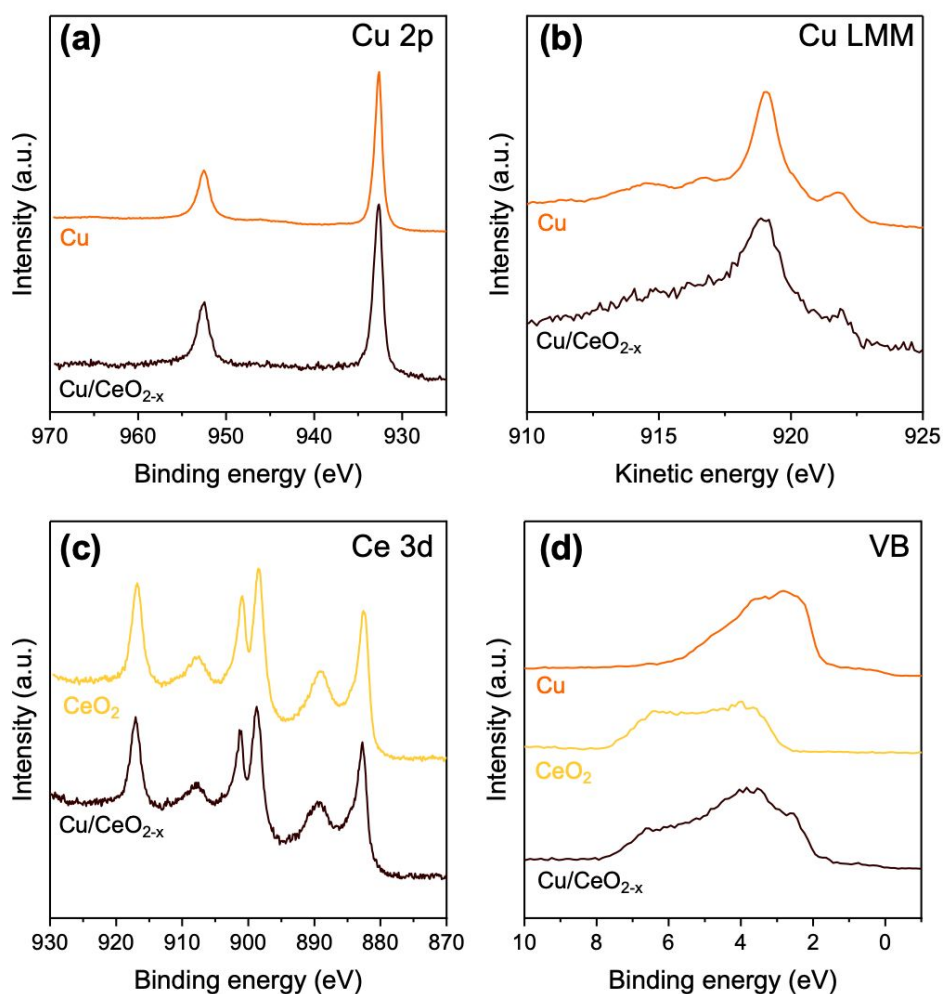

Figure S2 (a) Cu 2p, (b) Cu LMM Auger, (c) Ce 3d region XPS spectra, and (d) X-ray excited valence band spectra of the Cu/CeO<sub>2-x</sub> model surface, a fully oxidized CeO<sub>2</sub> thin film sample prepared by oxidation (0.5 mbar O<sub>2</sub>, 423 K, 60 min) of the reactive deposited ceria thin film, and a sputter-cleaned metallic Cu foil.

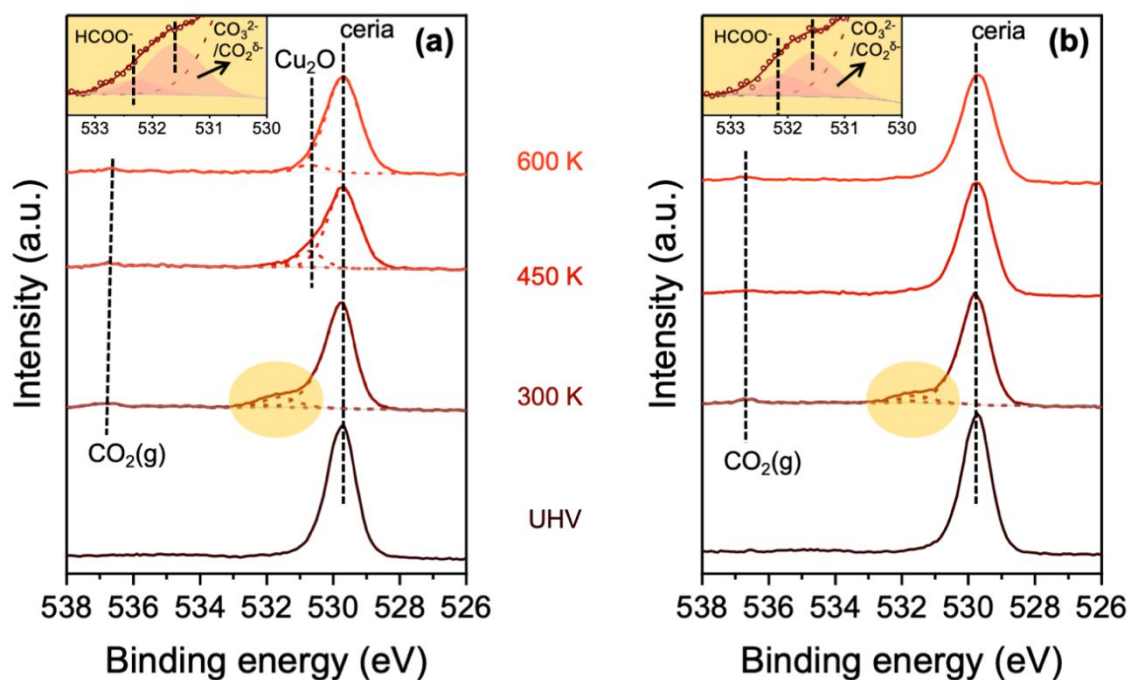

| Peak assignment                                              | Peak position   |                                 | FWHM/eV         |                                 | Peak area       |                                 |
|--------------------------------------------------------------|-----------------|---------------------------------|-----------------|---------------------------------|-----------------|---------------------------------|
|                                                              | CO <sub>2</sub> | CO <sub>2</sub> +H <sub>2</sub> | CO <sub>2</sub> | CO <sub>2</sub> +H <sub>2</sub> | CO <sub>2</sub> | CO <sub>2</sub> +H <sub>2</sub> |
| CO <sub>3</sub> <sup>2-</sup> /CO <sub>2</sub> <sup>δ-</sup> | 531.6           | 531.6                           | 1.1             | 1.1                             | 726             | 461                             |
| HCOO <sup>-</sup>                                            | 532.3           | 532.1                           | 1.0             | 1.0                             | 159             | 221                             |

Figure S3 O 1s spectra of the Cu/CeO<sub>2-x</sub> model surface under UHV and (a) 0.2 mbar of CO<sub>2</sub>, and (b) 0.2 mbar CO<sub>2</sub> + 0.6 mbar of H<sub>2</sub> at 300, 450, and 600 K. The peak positions and FWHMs used in the deconvolution is shown in the table below the figures.

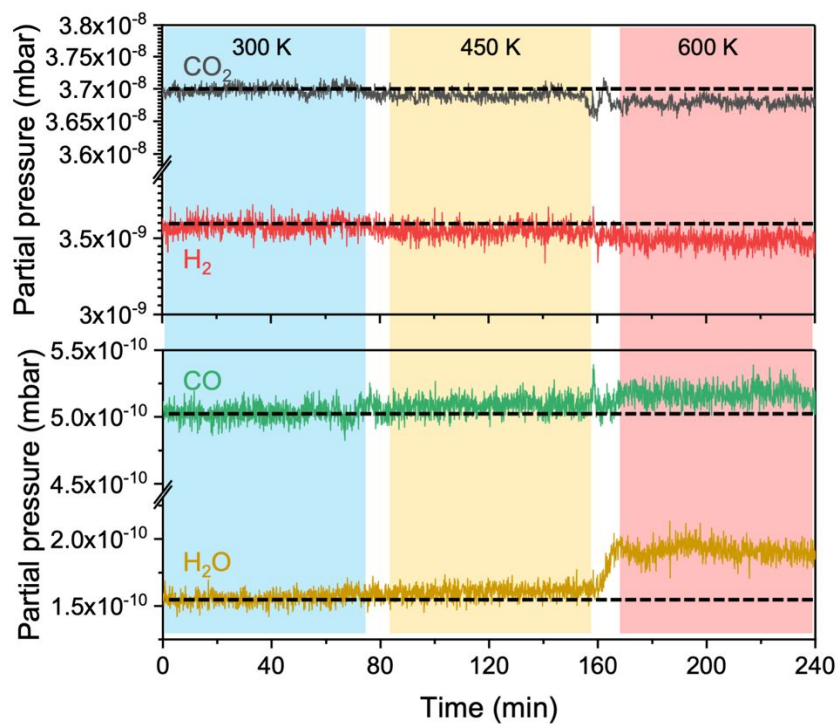

Figure S4 Gas species detected by RGA at the pre-lens stage of the NAP-XPS during measurements of the Cu/CeO<sub>2-x</sub> model surface under 0.2 mbar CO<sub>2</sub> + 0.6 mbar of H<sub>2</sub> at 300, 450, and 600 K.

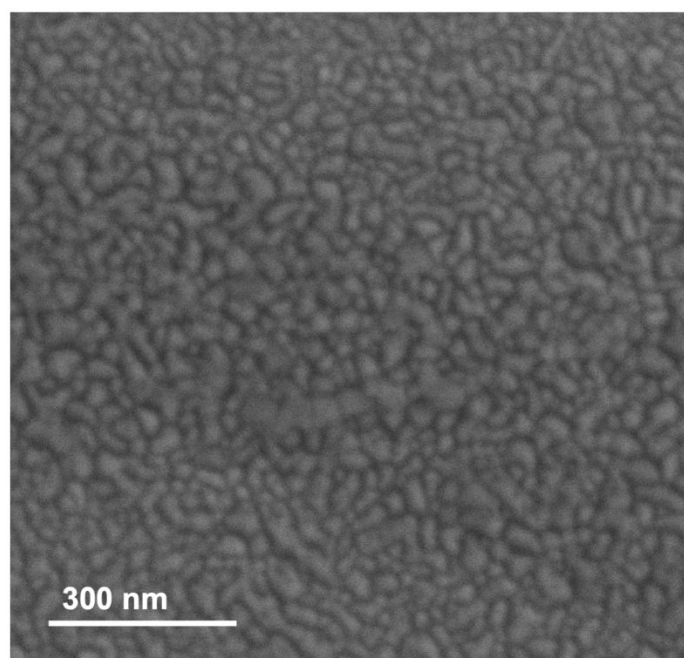

Figure S5 SEM image of as-prepared Cu/CeO<sub>2-x</sub> model surface.

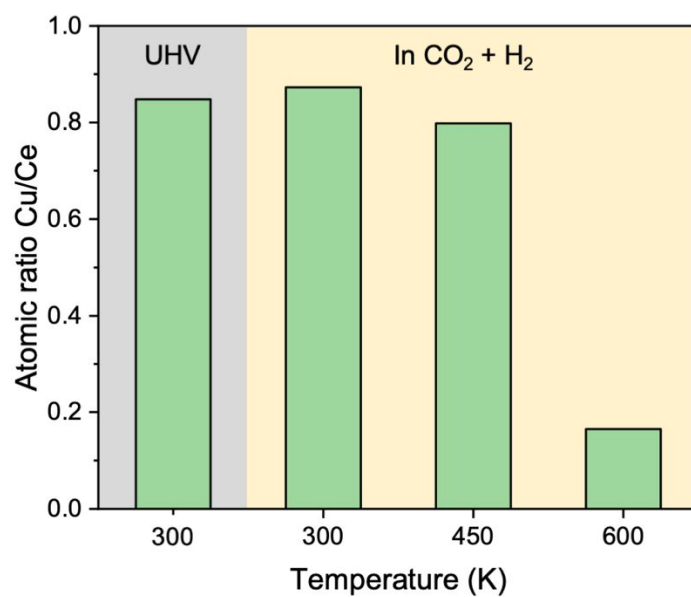

Figure S6 The atomic ratio of Cu/Ce on the Cu/CeO<sub>2-x</sub> model surface under UHV and 0.2 mbar of CO<sub>2</sub> + 0.6 mbar of H<sub>2</sub> at 300, 450, and 600 K, determined by the Cu 2p and Ce 3d peak areas after correction by their corresponding RSFs

(a)

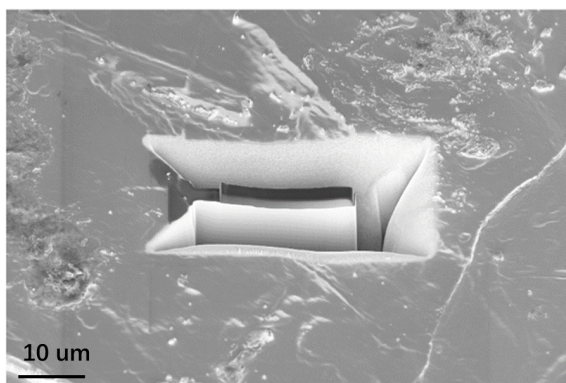

(b)

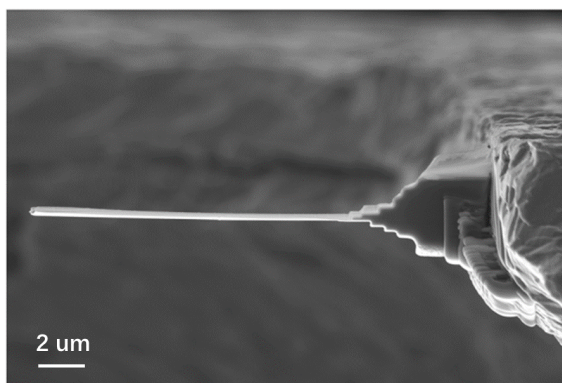

Figure S7 TEM lamella of the thin-film Cu/CeO<sub>2-x</sub> sample prepared by FIB: (a) the cut volume with surface protection by carbon before lift-out, (b) the electron-transparent TEM lamella glued on Mo grid after thinning.



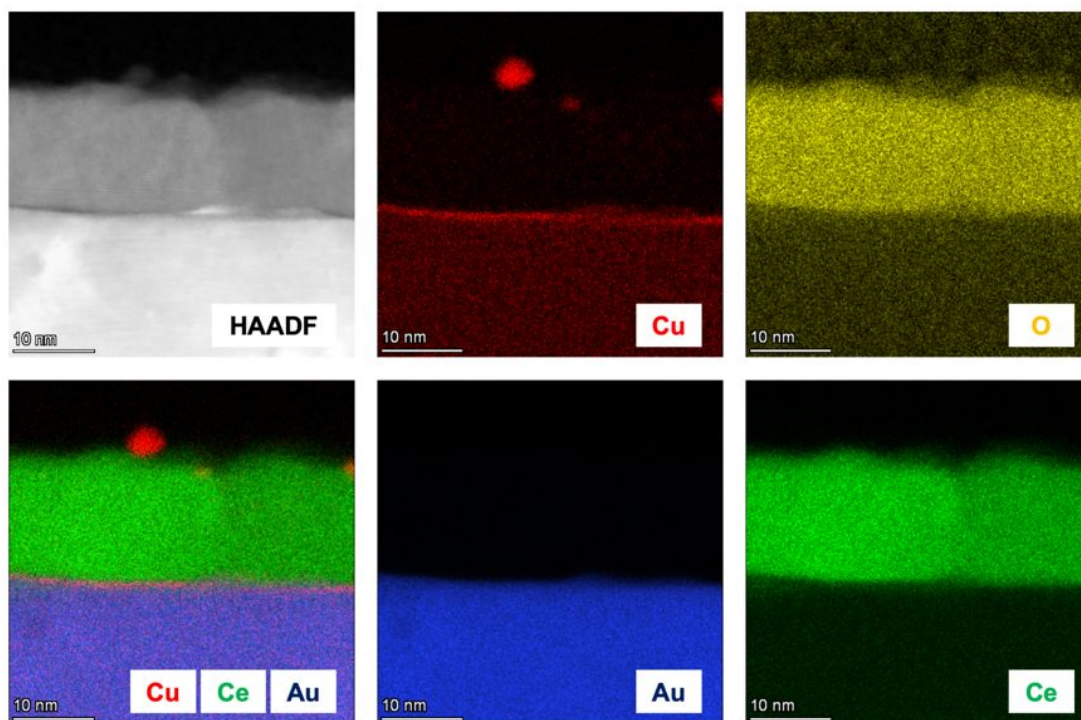

Figure S8 Additional cross-sectional STEM-HAADF image, and STEM-EDX elemental map of the Cu/CeO<sub>2-x</sub> model surface after exposure to 0.2 mbar of CO<sub>2</sub> + 0.6 mbar of H<sub>2</sub> at 600 K for 1 h.
